# Supplementary material for: Synthesis of Highly Porous Cu2O Catalysts for Efficient Ozone Decomposition
Source: MDPI journal article supplement (doi:10.3390/catal11050600), 2021-05-06
Supplement: s1 [file s1]

# Supplementary Materials: Synthesis of Highly Porous Cu<sub>2</sub>O Catalysts for Efficient Ozone Decomposition

Yishan Jiang <sup>1,\*</sup>, Juna Chen <sup>1</sup>, Xin Zhao <sup>1</sup> and Guojun Ma <sup>2</sup>

<sup>1</sup> Power Control Department, Navy Submarine Academy, Qingdao 266199, China; chenjuna2012@163.com (J.C.); zxnew2657zx@163.com (X.Z.)

<sup>2</sup> State Key Laboratory of Multiphase Complex Systems, Institute of Process Engineering, Chinese Academy of Sciences, Beijing 100190, China; gjma@ipe.ac.cn

\* Correspondence: jys130@126.com

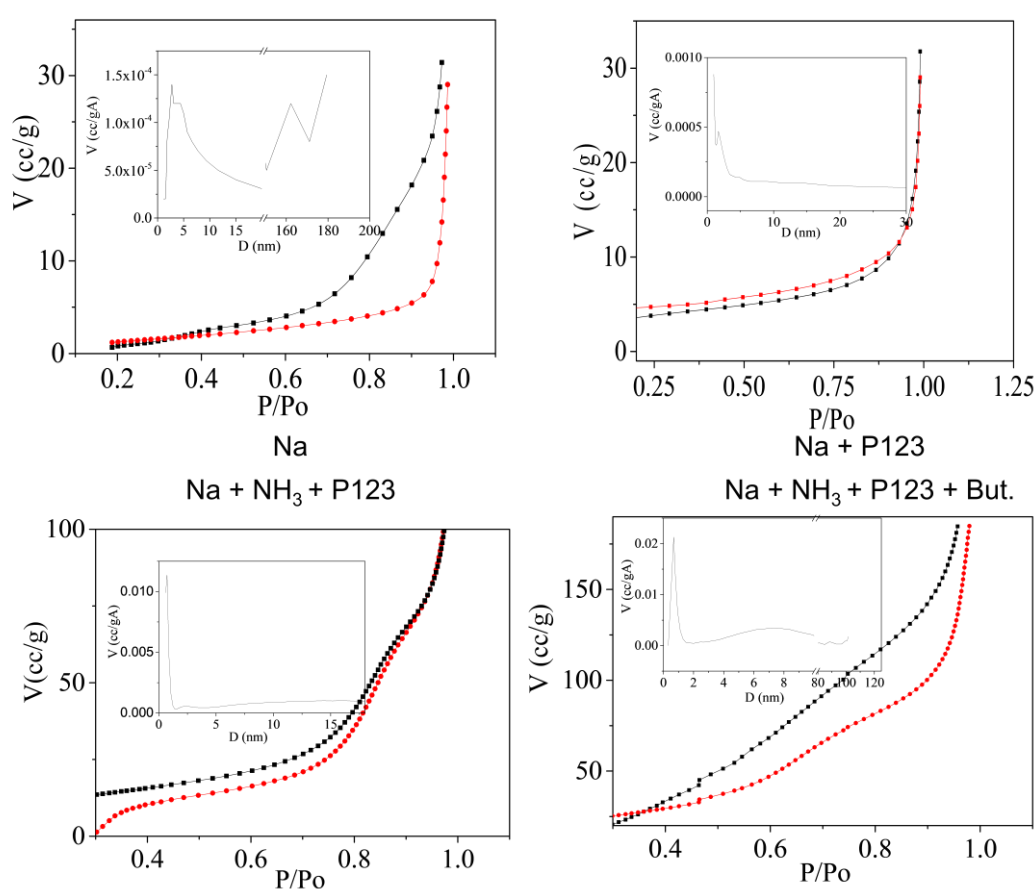

**Figure S1.** Nitrogen adsorption-desorption characterizations of the Cu<sub>2</sub>O catalysts by using (a) Na, (b) Na + P123, (c) Na + NH<sub>3</sub> + P123, (d) Na + NH<sub>3</sub> + P123 + But..

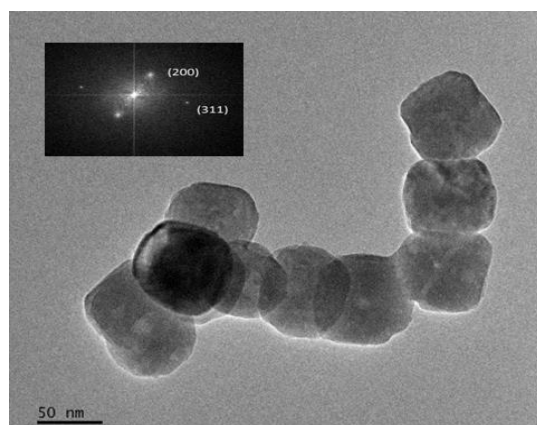

**Figure S2.** TEM images of Cu<sub>2</sub>O catalysts synthesized by Na + Butanol.

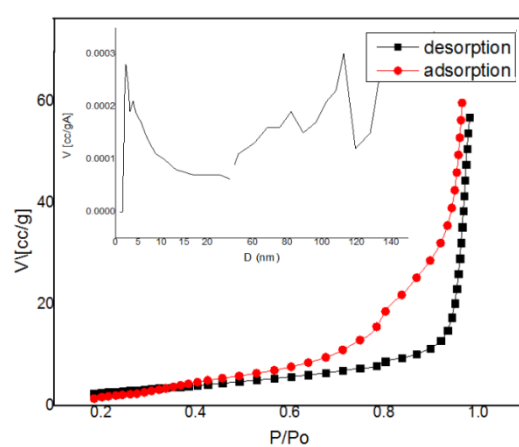

**Figure S3.** Nitrogen adsorption-desorption characterizations of the Cu<sub>2</sub>O synthesized by Na + Butanol.
